# Supplementary material for: A flexible hybrid capacitor based an NiCo2S4 nanowire electrode with an ultrahigh capacitance
Source: Royal Society of Chemistry journal article supplement (doi:10.1039/d0dt04381h), 2021-01-01
Supplement: d0dt04381h1.pdf [file d0dt04381h1.pdf]

**A flexible hybrid capacitor based NiCo<sub>2</sub>S<sub>4</sub> nanowire electrode with  
an ultrahigh capacitance**

Tong Xia<sup>a</sup>, Ying Liu<sup>a</sup>, Meizhen Dai<sup>a</sup>, Qing Xia<sup>a</sup>, Xiang Wu<sup>a, b, c\*</sup>

<sup>a</sup>School of Materials Science and Engineering, Shenyang University of Technology,

Shenyang 110870, P. R. China

<sup>b</sup>Wuhan National Laboratory for Optoelectronics, Huazhong University of Science

and Technology, Wuhan 430074, P. R.China

<sup>c</sup>State Key Laboratory of High Performance Ceramics and Superfine

Microstructure, Shanghai Institute of Ceramics, Chinese Academy of Sciences,

Shanghai, 200050, P. R. China

\*Correspondences should be addressed: [wuxiang05@163.com](mailto:wuxiang05@163.com); [wuxiang05@sut.edu.cn](mailto:wuxiang05@sut.edu.cn)

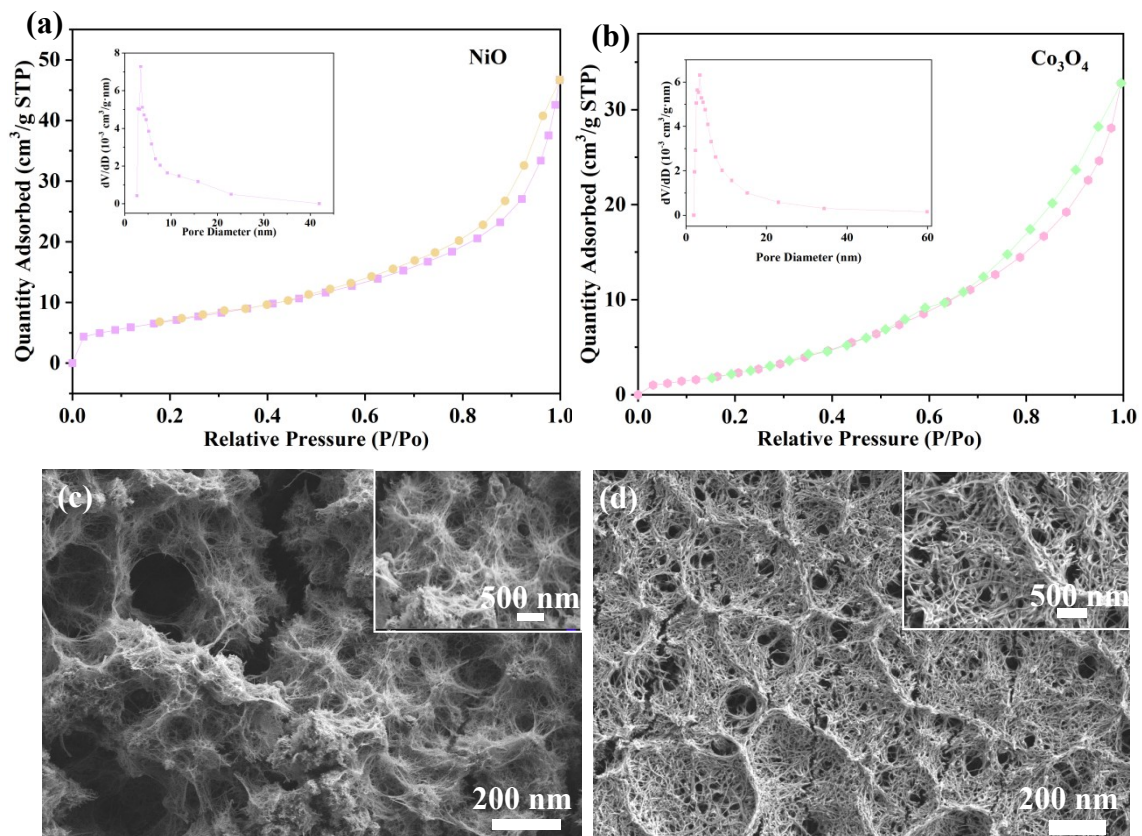

Fig. S1 N<sub>2</sub> adsorption-desorption isotherms and corresponding pore size distribution curve (inset) of NiO (a) and Co<sub>3</sub>O<sub>4</sub> (b) Morphology characterization: (c, d) SEM images of NiO and Co<sub>3</sub>O<sub>4</sub>

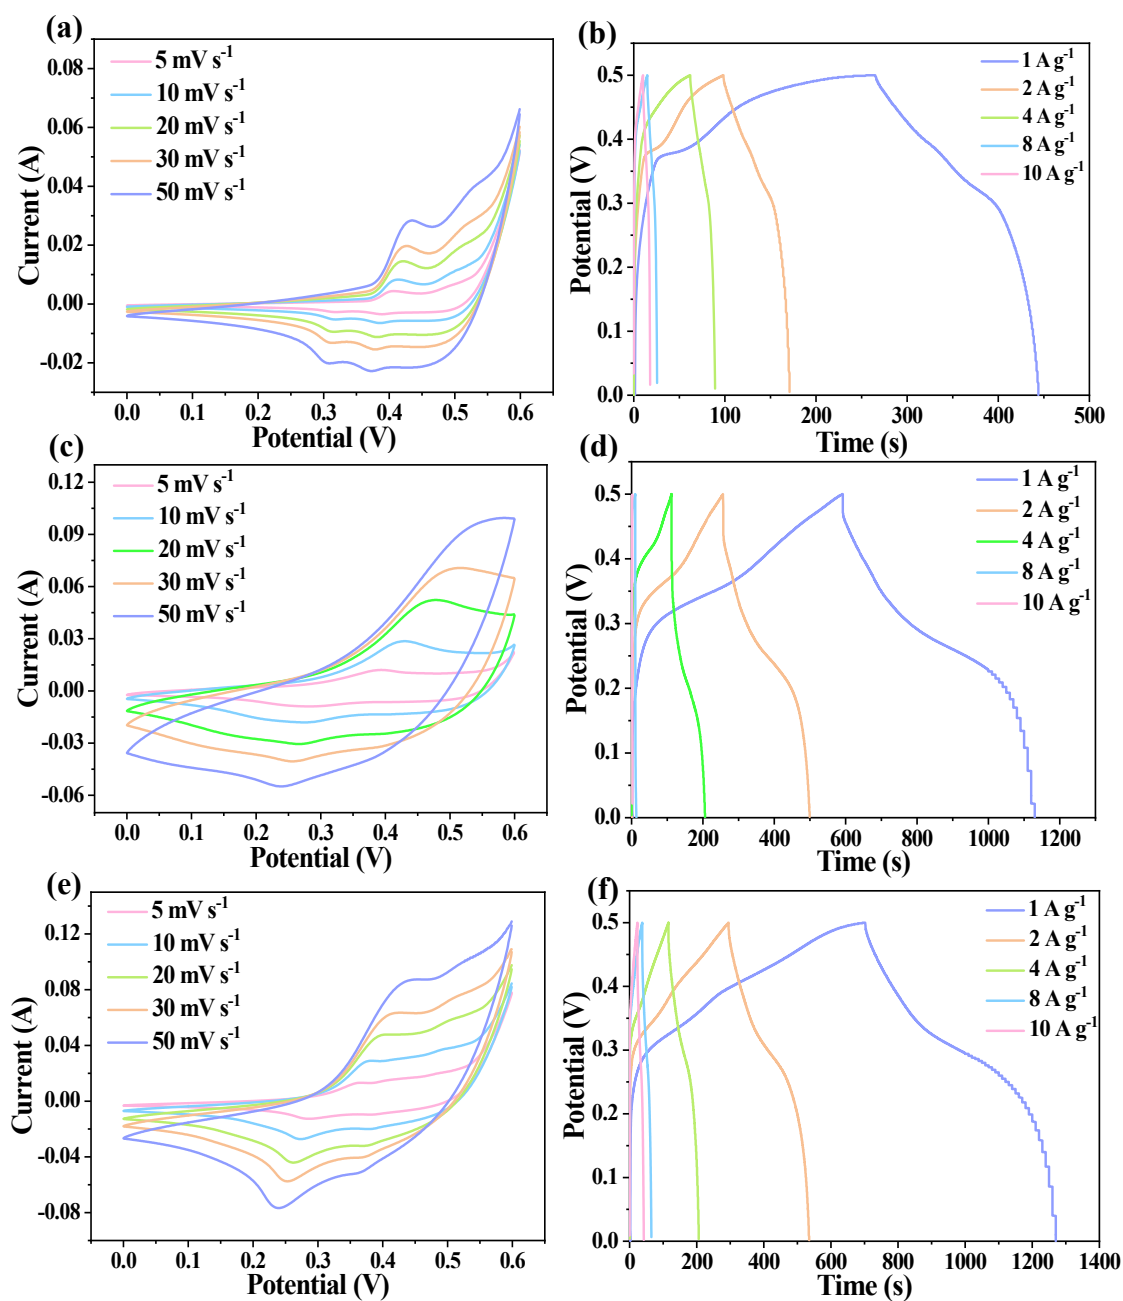

Fig. S2 Electrochemical performance: (a, c, e) CV curves of NiO, Co<sub>3</sub>O<sub>4</sub> and NiCo<sub>2</sub>O<sub>4</sub> at different scan rates; (b, d, f) GCD curves of NiO, Co<sub>3</sub>O<sub>4</sub> and NiCo<sub>2</sub>O<sub>4</sub> at different current density
